# Supplementary material
Source: HighWire-hosted journal article supplement (https://cmaj.ca/highwire/filestream/79326/field_highwire_adjunct_files/0/202795-res-1-at.pdf)
Supplement: 202795-res-1-at.pdf [file 202795-res-1-at.pdf]

## Appendix 1 (as submitted by the authors): Supplementary information

### Data Quality and Availability

Manual validation of data collected by GEMINI have previously demonstrated high accuracy, compared to data held in electronic medical records.<sup>1</sup> We note several issues with data availability.

First, in 3% of hospitalizations, no provincial health insurance number was recorded. These patients could not be linked across encounters and were therefore excluded from analyses of readmission.

Second, in 6% of hospitalizations, postal code was not available or was for residence in locations that could not be linked to census information. In regression models, we assumed these individuals to be in the middle quintile (Q3) for neighborhood-level measures.

Third, we were unable to electronically collect any vital signs data from Sunnybrook hospital. For patients with COVID-19 at that hospital, we manually abstracted the first vital sign reading between ED triage and up to 24 hours after admission by reviewing nurse and physician documentation. Vital signs were also missing from electronic clinical data in approximately 15% of COVID-19 patients, mainly because vital signs data are typically recorded on paper charts in the emergency department and ICU, so would be missing for patients transferred directly from ED to ICU. We manually collected these vital signs data for patients with COVID-19, to facilitate validation of risk scores, using the same approach as was used for Sunnybrook. This could bias the comparisons between COVID-19 and influenza, as we did not manually abstract data for patients with influenza. Given that it was typically ICU patients with missing electronic vitals data, this could bias COVID-19 vital signs toward appearing more abnormal. We did not include presenting vital signs in regression models comparing COVID-19 and influenza, so this would not bias comparisons for any of the clinical outcomes.

Fourth, diagnostic imaging and laboratory test data was missing from the emergency department portion of patient visits at Sunnybrook. For COVID-19 patients, we collected this data manually, but were unable to do so for influenza patients, and this could underestimate thoracic CT use or some laboratory test use in influenza patients. Manually adding this missing data changed the estimate of thoracic CT use in COVID-19 from 19.7% to 20.4%, so is unlikely to have a major effect on the estimates for influenza.

Finally, data regarding patient mental/neurological status (eg. Confusion Assessment Method or Glasgow Coma Scale) was available only in the COVID-19 patients for whom we manually collected data or electronically in some patients from two hospitals (St. Michael's Hospital and Mount Sinai Hospital). Two risk prediction models required this data (NEWS2 and ISARIC-4C), thus performance of those models was reported only in patients for whom these data were available.

## Respiratory-acting antibiotics

We report the use of antibiotics with action against respiratory bacterial pathogens, as described in clinical practice guidelines and prior literature.<sup>2-4</sup>

|                                                       |
|-------------------------------------------------------|
| <b>Antibiotic classes included</b>                    |
| Third Generation Cephalosporin                        |
| Macrolide                                             |
| Fluoroquinolone                                       |
| Penicillin-derived beta-lactams/beta-lactamase        |
| Other                                                 |
| Action against methicillin-resistant <i>S. aureus</i> |
| Simple Penicillins                                    |
| Ceftazidime                                           |
| Tetracyclines                                         |
| Carbapenem (with and without pseudomonas coverage)    |
| Clindamycin                                           |

## Specific antibiotics included

Third generation cephalosporin=Ceftriaxone, cefotaxime, cefepime, cefdinir, ceftiofen, cefpodoxime, ceftaroline. Macrolide=Azithromycin, clarithromycin, erythromycin, streptomycin.

Fluoroquinolone=levofloxacin, moxifloxacin, ciprofloxacin, gemifloxacin. Tetracyclines=doxycycline.

Penicillin-derived beta-lactam/beta-lactamases=amoxicillin-clavulanic acid, ampicillin-sulbactam, ticarcillin-clavulanate, piperacillin-tazobactam. Carbapenems=meropenem, imipenem, imipenem+cilastatin. ertapenem. Action against methicillin-resistant *S. aureus* =vancomycin, linezolid.

Simple Penicillins=Penicillin G, amoxicillin, ticarcillin, flucloxacillin, ampicillin, piperacillin. Other=aztreonam, colistin, gentamicin, trimethoprim-sulfamethoxazole, first and second generation cephalosporins (cefazolin, cefprozil, cefuroxime, cephalexin).

### **Measuring neighbourhood-level variables**

Individual patient-level data regarding income and ethnicity were not available. To obtain neighbourhood-level variables, we linked 6-character patient postal codes to Census Dissemination Areas using Statistics Canada's Postal Code Conversion File Plus (version 7c; postal codes current up to November 2019).<sup>5</sup> We use data from the 2016 Census to report neighbourhood-level income (using neighbourhood after-tax income per single person equivalent) and visible minority concentration, defined as the percentage of residents who self-identified as belonging to a visible minority.<sup>6</sup> We derived quintile category boundaries for both income and visible minority status based on all dissemination areas in the Toronto Census Metropolitan Area and assigned each hospital admission to a quintile. Q1 to Q5 represented lowest to highest income and visible minority status concentration, respectively.

## Implementing mortality prediction scores for COVID-19

Mortality risk for COVID-19 hospitalizations was estimated using 7 externally developed risk scores, designed to predict short-term mortality. Risk scores were identified based on a living systematic review<sup>7</sup> and we selected the 4 best performing models in a UK-based external validation study<sup>8</sup> (AUROC > 0.7): Lu<sup>9</sup>, Hu<sup>10</sup>, Xie<sup>11</sup> and NEWS2<sup>12</sup>. We also predicted mortality using the modified APACHE (mAPACHE) score<sup>13</sup>, the critical illness severity scoring system (CISS)<sup>14</sup> and ISARIC-4C score<sup>15</sup>.

All scores were calculated based on the first valid laboratory and vital signs data that were available within 24 hours of hospital admission. Where comorbidity data was needed, we used discharge diagnoses for chronic conditions. ISARIC-4C used the number of Charlson comorbidities, which we were able to compute, and also clinician-defined obesity, which we were unable to include. Both ISARIC-4C and NEWS2 require assessment of patient mental/neurological status. ISARIC-4C assigns points for GCS <15 whereas NEWS2 assigns points for “confusion”. We calculated these scores only in encounters for which patient mental/neurological status was measured using either GCS or the Confusion Assessment Method (CAM). We considered a positive CAM screen or GCS < 15 to represent altered mental status for both scores.

We report results for encounters for which we have complete data, and after the mean imputation of missing laboratory test result values, based on the assumption that if a laboratory test result was not ordered by a clinician, it was more likely to be normal. The missing data in numeric variables was imputed by taking the COVID-population mean value. We did not include patients in risk calculations with missing vital signs data in the observation window (which may have occurred for example because patients were considered palliative). We did not think it was fair to assume these values would be normal. We considered a patient to have surgery for the purpose of risk scores if they had a surgical procedure code during their hospitalization. Finally, because administrative codes for mechanical ventilation did not reliably report the timing of the intervention, we considered a patient to be ventilated in the first 24 hours of admission if they had an invasive mechanical ventilation code and the first day of their ICU admission was within 24 hours of their hospital admission time.

**Table S1. Unadjusted outcomes stratified by age**

| <b>Outcome</b>                    | <b>COVID-19</b>  | <b>Influenza</b> | <b>p</b> |
|-----------------------------------|------------------|------------------|----------|
| Age <50 years – N                 | 218              | 141              |          |
| Death – N (%)                     | 11 (5.1)         | <6 (<4.3)*       | 0.020    |
| 30-day Readmission – N (%)        | 14 (9.2)         | 12 (9.0)         | 0.50     |
| ICU – N (%)                       | 65 (29.8)        | 27 (19.2)        | 0.017    |
| Hospital LOS, days – median (IQR) | 5.6 (2.5, 12.9)  | 3.5 (1.5, 8.2)   | <0.001   |
| Age 50-75 years – N               | 480              | 390              |          |
| Death – N (%)                     | 65 (13.5)        | 19 (4.9)         | <0.001   |
| 30-day Readmission – N (%)        | 33 (9.9)         | 30 (8.3)         | 0.57     |
| ICU – N (%)                       | 169 (35.2)       | 83 (21.3)        | <0.001   |
| Hospital LOS, days – median (IQR) | 8.8 (3.6, 20.8)  | 4.2 (2.0, 8.8)   | <0.001   |
| Age >75 years – N                 | 329              | 252              |          |
| Death – N (%)                     | 128 (38.9)       | 26 (10.3)        | <0.001   |
| 30-day Readmission – N (%)        | 11 (7.9)         | 27 (12.2)        | 0.38     |
| ICU – N (%)                       | 37 (11.3)        | 31 (12.3)        | <0.001   |
| Hospital LOS, days – median (IQR) | 11.9 (4.8, 25.1) | 6.4 (3.7, 11.9)  | <0.001   |

Table S1 Legend. 30-day unplanned readmission to a medical service or medical-surgical ICU at any participating hospital is reported after excluding patients who died and those discharged in the last 30 days of the study period. ICU: Intensive Care Unit. LOS: Length-of-stay. \*All counts less than 6 are suppressed to reduce risk of patient reidentification.

**Table S2. Characteristics, clinical outcomes, resource use, and clinical care of ICU patients with COVID-19 and Influenza**

| Variable                                       | COVID-19          | Influenza        | P        | SD    |
|------------------------------------------------|-------------------|------------------|----------|-------|
| Number of admissions                           | 271               | 141              |          |       |
| Age - median (IQR)                             | 59 (51, 70)       | 64 (54, 74)      | N/A      | 0.3   |
| Age Group – N (%)                              |                   |                  | N/A      | 0.23  |
| <50                                            | 65 (24.0)         | 27 (19.1)        |          |       |
| 50-75                                          | 169 (62.4)        | 83 (58.9)        |          |       |
| >75                                            | 37 (13.7)         | 31 (22.0)        |          |       |
| Male Gender – N (%)                            | 174 (64.2)        | 80 (56.7)        | N/A      | 0.15  |
| Charlson Score – N (%)                         |                   |                  | N/A      | 0.61  |
| 0                                              | 157 (57.9)        | 46 (32.6)        |          |       |
| 1                                              | 59 (21.8)         | 30 (21.3)        |          |       |
| 2+                                             | 55 (20.3)         | 65 (46.1)        |          |       |
| Neighborhood Income Quintile – N (%)           |                   |                  | N/A      | 0.24  |
| 1                                              | 95 (35)           | 56 (40)          |          |       |
| 2                                              | 53 (20)           | 23 (16)          |          |       |
| 3                                              | 36 (13)           | 15 (11)          |          |       |
| 4                                              | 36 (13)           | 22 (16)          |          |       |
| 5                                              | 26 (10)           | 18 (13)          |          |       |
| Neighborhood Visible Minority Quintile – N (%) |                   |                  | N/A      | 0.4   |
| 1                                              | 22 (8)            | 24 (17)          |          |       |
| 2                                              | 38 (14)           | 23 (16)          |          |       |
| 3                                              | 54 (20)           | 32 (23)          |          |       |
| 4                                              | 51 (19)           | 29 (21)          |          |       |
| 5                                              | 81 (30)           | 24 (17)          |          |       |
| Long-Term Care Resident – N (%)                | 10 (3.7)          | <6 (<4.3)*       | N/A      | 0.008 |
| Transfer from Acute Care Hospital – N (%)      | 84 (31.0)         | 19 (13.5)        | N/A      | 0.43  |
| Death – N (%)                                  | 69 (25.5)         | 28 (19.9)        | 0.25     | 0.13  |
| 7-day Readmission – N (%)                      | <6 (<2.2)*        | <6 (<4.3)*       | 1.0**    | 0.03  |
| 30-day Readmission – N (%)                     | 7 (4.7)           | 16 (14.8)        | 0.009    | 0.35  |
| Hospital LOS, days – median (IQR)              | 16.8 (10.6, 27.3) | 14.1 (6.8, 30.9) | 0.24     | 0.20  |
| ED LOS, hours – median (IQR)                   | 7.1 (4.6, 9.8)    | 12.5 (7.2, 24.4) | <0.001** | 0.77  |
| ICU LOS, days – median (IQR)                   | 10.9 (4.0, 17.8)  | 6.0 (2.3, 13.0)  | <0.001   | 0.03  |
| Invasive mechanical ventilation – N (%)        | 188 (69.4)        | 73 (51.8)        | 0.034**  | 0.37  |
| GI Endoscopy – N (%)                           | 7 (2.6)           | 13 (9.2)         | 0.33**   | 0.28  |
| Bronchoscopy – N (%)                           | 19 (7.0)          | 33 (23.4)        | <0.001** | 0.47  |
| Renal Replacement Therapy – N (%)              | 52 (19.2)         | 18 (12.8)        | 1**      | 0.18  |
| CT Thorax – N (%)                              | 79 (29.2)         | 53 (37.6)        | 1**      | 0.18  |
| Antibiotic – N (%)                             | 244 (90.7)        | 128 (92.1)       | 1**      | 0.05  |
| Corticosteroid – N (%)                         | 89 (33.1)         | 69 (49.6)        | 0.09**   | 0.34  |
| Warfarin or DOAC – N (%)                       | 47 (17.5)         | 34 (24.5)        | 1**      | 0.17  |

Table S2 Legend. Unplanned readmission to a medical service or medical-surgical ICU at any participating hospital is reported, after excluding patients who died or were discharged in last 7- or 30-days of study period, respectively (denominator for COVID-19: 185 and 150 for 7- and 30-day, respectively and for influenza: 110 and 108 for 7- and 30-day respectively). For hospital resources and clinical care, we report the number of patients receiving at least one of the item described. ICU: Intensive Care Unit. LOS: Length-of-stay. GI: Gastrointestinal. Renal replacement therapy included hemodialysis and peritoneal dialysis and included both chronic use and new starts. CT: Computed tomography. Antibiotic: we report the use of respiratory-acting antibiotics (see Appendix). DOAC: direct-acting oral anticoagulant. \*Exact number suppressed to reduce risk of patient reidentification. \*\*p-values were adjusted using Bonferroni correction.

**Table S3. Discriminative accuracy of mortality prediction models in COVID-19 hospitalizations with complete data**

| Measure           | Sensitivity       | Specificity       | PPV               | NPV               |
|-------------------|-------------------|-------------------|-------------------|-------------------|
| lu_index_2+       | 0.98 (0.92, 1.00) | 0.15 (0.11, 0.19) | 0.19 (0.15, 0.24) | 0.98 (0.89, 1.00) |
| lu_index_3+       | 0.77 (0.65, 0.87) | 0.62 (0.57, 0.68) | 0.29 (0.23, 0.37) | 0.93 (0.89, 0.96) |
| hu_index_0.1+     | 0.97 (0.86, 1.00) | 0.36 (0.30, 0.44) | 0.23 (0.17, 0.31) | 0.99 (0.92, 1.00) |
| hu_index_0.2+     | 0.84 (0.69, 0.94) | 0.52 (0.45, 0.59) | 0.26 (0.18, 0.34) | 0.94 (0.88, 0.98) |
| hu_index_0.3+     | 0.76 (0.60, 0.89) | 0.61 (0.54, 0.68) | 0.28 (0.20, 0.38) | 0.93 (0.87, 0.97) |
| hu_index_0.4+     | 0.66 (0.49, 0.80) | 0.72 (0.65, 0.79) | 0.32 (0.22, 0.44) | 0.91 (0.86, 0.95) |
| hu_index_0.5+     | 0.61 (0.43, 0.76) | 0.80 (0.73, 0.85) | 0.37 (0.25, 0.50) | 0.91 (0.86, 0.95) |
| hu_index_0.6+     | 0.55 (0.38, 0.71) | 0.86 (0.80, 0.91) | 0.44 (0.29, 0.59) | 0.91 (0.85, 0.94) |
| hu_index_0.7+     | 0.42 (0.26, 0.59) | 0.91 (0.86, 0.95) | 0.48 (0.31, 0.66) | 0.89 (0.84, 0.93) |
| hu_index_0.8+     | 0.21 (0.10, 0.37) | 0.95 (0.91, 0.98) | 0.47 (0.23, 0.72) | 0.86 (0.81, 0.90) |
| hu_index_0.9+     | 0.11 (0.03, 0.25) | 0.98 (0.95, 0.99) | 0.50 (0.16, 0.84) | 0.85 (0.79, 0.89) |
| xie_index_0.1+    | 0.92 (0.85, 0.97) | 0.44 (0.39, 0.49) | 0.28 (0.23, 0.34) | 0.96 (0.92, 0.98) |
| xie_index_0.2+    | 0.81 (0.71, 0.89) | 0.69 (0.64, 0.74) | 0.39 (0.32, 0.46) | 0.94 (0.90, 0.96) |
| xie_index_0.3+    | 0.57 (0.46, 0.67) | 0.83 (0.79, 0.87) | 0.45 (0.35, 0.54) | 0.89 (0.85, 0.92) |
| xie_index_0.4+    | 0.37 (0.27, 0.47) | 0.90 (0.86, 0.93) | 0.46 (0.34, 0.58) | 0.86 (0.82, 0.89) |
| xie_index_0.5+    | 0.24 (0.16, 0.35) | 0.95 (0.92, 0.97) | 0.54 (0.37, 0.69) | 0.84 (0.80, 0.87) |
| xie_index_0.6+    | 0.10 (0.05, 0.18) | 0.97 (0.95, 0.98) | 0.43 (0.22, 0.66) | 0.82 (0.78, 0.85) |
| xie_index_0.7+    | 0.07 (0.02, 0.14) | 0.98 (0.97, 0.99) | 0.50 (0.21, 0.79) | 0.82 (0.78, 0.85) |
| xie_index_0.8+    | 0.01 (0.00, 0.06) | 0.99 (0.98, 1.00) | 0.25 (0.01, 0.81) | 0.81 (0.77, 0.84) |
| xie_index_0.9+    | 0.00 (0.00, 0.04) | 0.99 (0.98, 1.00) | 0.00 (0.00, 0.84) | 0.81 (0.77, 0.84) |
| mapache_index_15+ | 1.00 (0.96, 1.00) | 0.30 (0.24, 0.35) | 0.32 (0.27, 0.38) | 1.00 (0.95, 1.00) |
| mapache_index_40+ | 0.43 (0.32, 0.54) | 0.96 (0.93, 0.98) | 0.79 (0.64, 0.89) | 0.83 (0.79, 0.87) |
| mapache_index_50+ | 0.13 (0.06, 0.21) | 1.00 (0.99, 1.00) | 1.00 (0.72, 1.00) | 0.77 (0.73, 0.82) |
| mapache_index_60+ | 0.06 (0.02, 0.13) | 1.00 (0.99, 1.00) | 1.00 (0.48, 1.00) | 0.76 (0.71, 0.81) |
| cisss_index_0.1+  | 0.42 (0.31, 0.54) | 0.93 (0.90, 0.96) | 0.62 (0.47, 0.75) | 0.86 (0.82, 0.90) |
| cisss_index_0.2+  | 0.12 (0.06, 0.22) | 0.98 (0.95, 0.99) | 0.60 (0.32, 0.84) | 0.81 (0.76, 0.85) |
| cisss_index_0.3+  | 0.08 (0.03, 0.17) | 0.99 (0.97, 1.00) | 0.75 (0.35, 0.97) | 0.81 (0.76, 0.85) |
| cisss_index_0.4+  | 0.05 (0.01, 0.13) | 1.00 (0.98, 1.00) | 0.80 (0.28, 0.99) | 0.80 (0.76, 0.84) |
| cisss_index_0.5+  | 0.04 (0.01, 0.11) | 1.00 (0.99, 1.00) | 1.00 (0.29, 1.00) | 0.80 (0.75, 0.84) |
| cisss_index_0.6+  | 0.01 (0.00, 0.07) | 1.00 (0.99, 1.00) | 1.00 (0.03, 1.00) | 0.79 (0.75, 0.84) |
| news2_index_5+    | 0.83 (0.68, 0.93) | 0.53 (0.46, 0.60) | 0.26 (0.19, 0.35) | 0.94 (0.88, 0.97) |
| news2_index_7+    | 0.68 (0.52, 0.82) | 0.64 (0.57, 0.71) | 0.28 (0.19, 0.38) | 0.91 (0.85, 0.95) |

Table S3 Legend. Mortality risk scores<sup>9-15</sup> were calculated based on first valid measurement between ED triage and 24 hours after admission. We report model performance based on hospitalizations with complete data for all inputs.



**Table S4. Discriminative accuracy of mortality prediction models in COVID-19 hospitalizations after mean imputation of missing laboratory values**

| Measure           | Sensitivity       | Specificity       | PPV               | NPV               |
|-------------------|-------------------|-------------------|-------------------|-------------------|
| lu_index_2+       | 1.00 (0.97, 1.00) | 0.06 (0.04, 0.08) | 0.21 (0.18, 0.23) | 0.98 (0.89, 1.00) |
| lu_index_3+       | 0.84 (0.79, 0.89) | 0.50 (0.47, 0.54) | 0.30 (0.26, 0.33) | 0.93 (0.90, 0.95) |
| hu_index_0.1+     | 0.92 (0.87, 0.95) | 0.34 (0.31, 0.37) | 0.26 (0.22, 0.29) | 0.94 (0.91, 0.97) |
| hu_index_0.2+     | 0.82 (0.76, 0.87) | 0.48 (0.44, 0.51) | 0.28 (0.25, 0.32) | 0.92 (0.89, 0.94) |
| hu_index_0.3+     | 0.72 (0.65, 0.78) | 0.59 (0.56, 0.63) | 0.30 (0.26, 0.35) | 0.89 (0.86, 0.92) |
| hu_index_0.4+     | 0.61 (0.54, 0.68) | 0.70 (0.67, 0.73) | 0.34 (0.29, 0.39) | 0.88 (0.85, 0.90) |
| hu_index_0.5+     | 0.55 (0.48, 0.62) | 0.78 (0.75, 0.81) | 0.39 (0.33, 0.45) | 0.88 (0.85, 0.90) |
| hu_index_0.6+     | 0.46 (0.39, 0.53) | 0.86 (0.83, 0.88) | 0.45 (0.38, 0.52) | 0.87 (0.84, 0.89) |
| hu_index_0.7+     | 0.34 (0.27, 0.41) | 0.91 (0.89, 0.93) | 0.48 (0.40, 0.57) | 0.85 (0.82, 0.87) |
| hu_index_0.8+     | 0.16 (0.11, 0.21) | 0.96 (0.94, 0.97) | 0.47 (0.35, 0.60) | 0.82 (0.79, 0.84) |
| hu_index_0.9+     | 0.06 (0.03, 0.10) | 0.99 (0.98, 0.99) | 0.52 (0.31, 0.73) | 0.81 (0.78, 0.83) |
| xie_index_0.1+    | 0.88 (0.82, 0.92) | 0.45 (0.41, 0.48) | 0.28 (0.24, 0.32) | 0.94 (0.91, 0.96) |
| xie_index_0.2+    | 0.66 (0.59, 0.73) | 0.71 (0.68, 0.74) | 0.36 (0.31, 0.41) | 0.90 (0.87, 0.92) |
| xie_index_0.3+    | 0.46 (0.39, 0.53) | 0.86 (0.84, 0.89) | 0.45 (0.38, 0.53) | 0.87 (0.84, 0.89) |
| xie_index_0.4+    | 0.30 (0.24, 0.37) | 0.92 (0.90, 0.94) | 0.50 (0.40, 0.59) | 0.84 (0.82, 0.87) |
| xie_index_0.5+    | 0.17 (0.12, 0.23) | 0.97 (0.95, 0.98) | 0.56 (0.42, 0.69) | 0.83 (0.80, 0.85) |
| xie_index_0.6+    | 0.07 (0.04, 0.11) | 0.98 (0.97, 0.99) | 0.45 (0.26, 0.64) | 0.81 (0.78, 0.84) |
| xie_index_0.7+    | 0.04 (0.01, 0.07) | 0.99 (0.98, 1.00) | 0.47 (0.21, 0.73) | 0.81 (0.78, 0.83) |
| xie_index_0.8+    | 0.01 (0.00, 0.03) | 0.99 (0.99, 1.00) | 0.17 (0.00, 0.64) | 0.80 (0.78, 0.83) |
| xie_index_0.9+    | 0.00 (0.00, 0.02) | 1.00 (0.99, 1.00) | 0.00 (0.00, 0.71) | 0.80 (0.78, 0.83) |
| isaric_index_6+   | 1.00 (0.91, 1.00) | 0.17 (0.12, 0.23) | 0.20 (0.15, 0.26) | 1.00 (0.90, 1.00) |
| isaric_index_9+   | 0.90 (0.77, 0.97) | 0.43 (0.36, 0.50) | 0.24 (0.18, 0.32) | 0.96 (0.89, 0.99) |
| isaric_index_12+  | 0.56 (0.40, 0.72) | 0.83 (0.77, 0.88) | 0.40 (0.27, 0.53) | 0.90 (0.85, 0.94) |
| mapache_index_15+ | 0.99 (0.96, 1.00) | 0.18 (0.16, 0.21) | 0.23 (0.20, 0.26) | 0.99 (0.95, 1.00) |
| mapache_index_40+ | 0.38 (0.31, 0.46) | 0.94 (0.92, 0.95) | 0.59 (0.50, 0.68) | 0.86 (0.84, 0.88) |
| mapache_index_50+ | 0.12 (0.07, 0.17) | 0.99 (0.98, 1.00) | 0.76 (0.56, 0.90) | 0.82 (0.80, 0.85) |
| mapache_index_60+ | 0.05 (0.02, 0.09) | 1.00 (1.00, 1.00) | 1.00 (0.66, 1.00) | 0.81 (0.79, 0.84) |
| cisss_index_0.1+  | 0.32 (0.25, 0.39) | 0.95 (0.93, 0.96) | 0.60 (0.50, 0.69) | 0.85 (0.83, 0.87) |
| cisss_index_0.2+  | 0.09 (0.06, 0.14) | 0.99 (0.98, 1.00) | 0.69 (0.48, 0.86) | 0.82 (0.79, 0.84) |
| cisss_index_0.3+  | 0.06 (0.03, 0.11) | 1.00 (0.99, 1.00) | 0.80 (0.52, 0.96) | 0.81 (0.79, 0.84) |
| cisss_index_0.4+  | 0.03 (0.01, 0.06) | 1.00 (0.99, 1.00) | 0.83 (0.36, 1.00) | 0.81 (0.78, 0.83) |
| cisss_index_0.5+  | 0.02 (0.00, 0.05) | 1.00 (1.00, 1.00) | 1.00 (0.29, 1.00) | 0.81 (0.78, 0.83) |
| cisss_index_0.6+  | 0.01 (0.00, 0.03) | 1.00 (1.00, 1.00) | 1.00 (0.03, 1.00) | 0.81 (0.78, 0.83) |
| news2_index_5+    | 0.83 (0.68, 0.93) | 0.53 (0.46, 0.60) | 0.26 (0.19, 0.35) | 0.94 (0.88, 0.97) |
| news2_index_7+    | 0.68 (0.52, 0.82) | 0.64 (0.57, 0.71) | 0.28 (0.19, 0.38) | 0.91 (0.85, 0.95) |

Table S4 Legend. Mortality risk scores<sup>9-15</sup> were calculated based on first valid measurement between ED triage and 24 hours after admission. We report model performance based on hospitalizations with complete data for vital signs and mental/neurological status and mean imputation for missing laboratory test results.

**Figure S1. Calibration plots for mortality prediction models in COVID-19 hospitalizations**

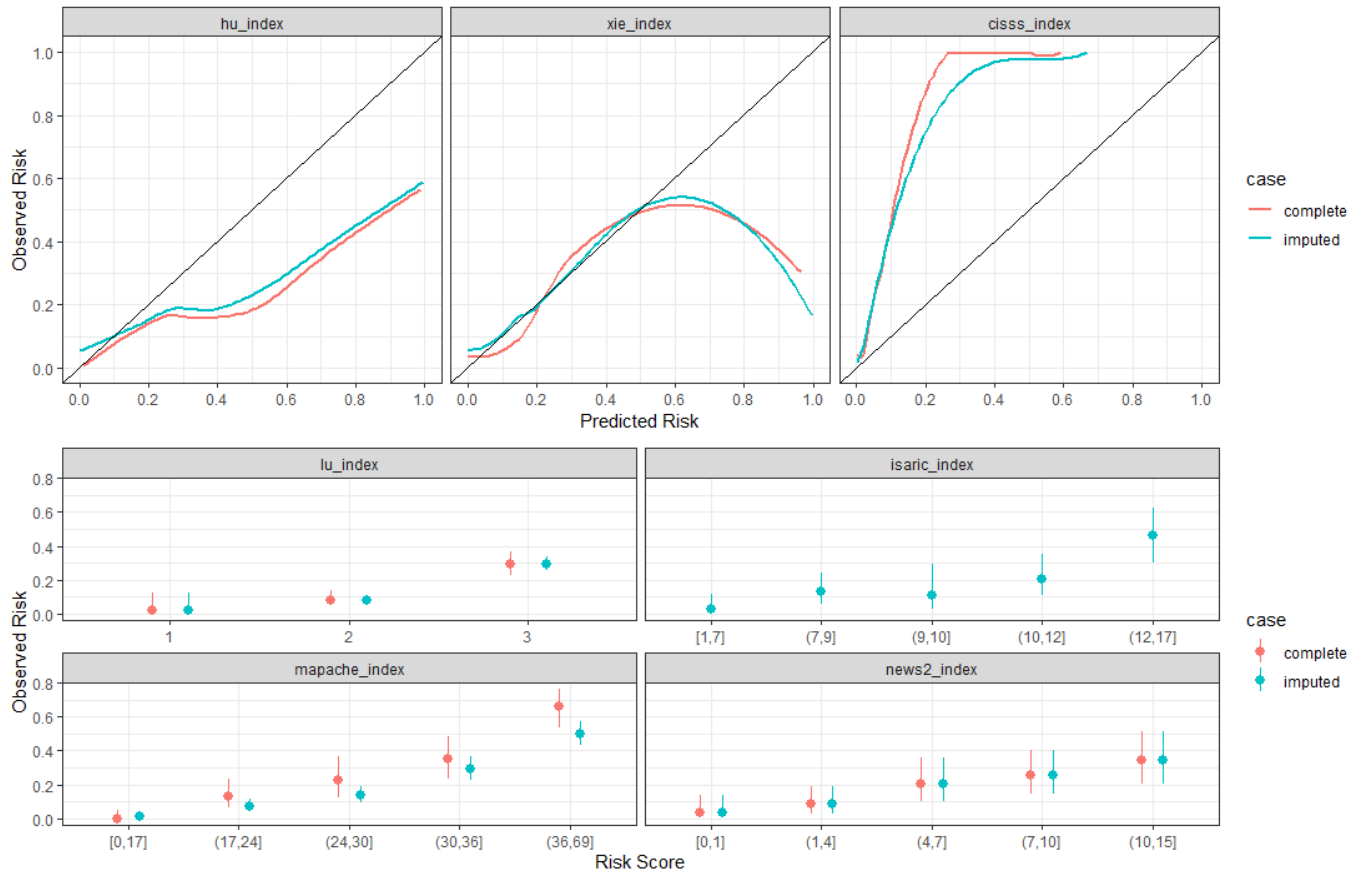

**Figure S1 Legend.** We report model calibration visually, by plotting model scores versus observed outcome proportions for points-based systems and Loess-smoothed calibration plots comparing observed to predicted probabilities for probability score-based systems.

## **Sensitivity Analyses**

Our findings were materially unchanged after excluding the 79 COVID-19 admissions without laboratory confirmation of virus infection (data not shown).

ED admissions accounted for 73.3% of COVID-19 and 86.0% of influenza admissions. Findings were generally similar after excluding non-ED admissions (Tables S5-9), except differences in hospital length-of-stay and ICU use were somewhat attenuated.

When ICU and death were treated as a composite outcome to account for competing risks, COVID-19 remained more severe than influenza (aRR 1.99, 95% CI: 1.70, 2.34, Table S10). Results were not meaningfully changed after including only one admission per patient to account for clustering (data not shown).

**Table S5. Characteristics of hospitalizations for COVID-19 and influenza, among patients admitted from the emergency department**

| Variable                                       | COVID-19             | Influenza            | SD <sup>a</sup> |
|------------------------------------------------|----------------------|----------------------|-----------------|
| Number of admissions                           | 753                  | 673                  |                 |
| Number of unique patients                      | 727 (96.5)           | 660 (98.1)           | 0.094           |
| Age - median (IQR)                             | 66.00 [53.00, 80.00] | 69.00 [56.00, 81.00] | 0.088           |
| Age Group – N (%)                              |                      |                      | 0.139           |
| <50                                            | 166 (22.0)           | 115 (17.1)           |                 |
| 50-75                                          | 333 (44.2)           | 335 (49.8)           |                 |
| >75                                            | 254 (33.7)           | 223 (33.1)           |                 |
| Male Gender – N (%)                            | 437 (58.0)           | 339 (50.4)           | 0.154           |
| Charlson Score – N (%)                         |                      |                      | 0.314           |
| 0                                              | 406 (53.9)           | 259 (38.5)           |                 |
| 1                                              | 126 (16.7)           | 146 (21.7)           |                 |
| 2+                                             | 221 (29.3)           | 268 (39.8)           |                 |
| Neighbourhood Income Quintile – N (%)          |                      |                      | 0.148           |
| 1                                              | 265 (35.2)           | 225 (33.4)           |                 |
| 2                                              | 118 (15.7)           | 117 (17.4)           |                 |
| 3                                              | 117 (15.5)           | 107 (15.9)           |                 |
| 4                                              | 120 (15.9)           | 120 (17.8)           |                 |
| 5                                              | 83 (11.0)            | 79 (11.7)            |                 |
| Neighbourhood Visible Minority Quintile – N(%) |                      |                      | 0.167           |
| 1                                              | 73 (9.7)             | 81 (12.0)            |                 |
| 2                                              | 165 (21.9)           | 157 (23.3)           |                 |
| 3                                              | 210 (27.9)           | 157 (23.3)           |                 |
| 4                                              | 127 (16.9)           | 136 (20.2)           |                 |
| 5                                              | 125 (16.6)           | 109 (16.2)           |                 |
| Long-Term Care Resident – N (%)                | 108 (14.3)           | 33 (4.9)             | 0.32            |
| Hypertension - N (%)                           | 257 (34.1)           | 222 (33.0)           | 0.024           |
| Diabetes Mellitus - N (%)                      | 206 (27.4)           | 194 (28.8)           | 0.033           |
| Renal failure - N (%)                          | 139 (18.5)           | 136 (20.2)           | 0.044           |
| Neurocognitive disorders - N (%)               | 122 (16.2)           | 92 (13.7)            | 0.071           |
| Coronary heart disease - N (%)                 | 55 (7.3)             | 52 (7.7)             | 0.016           |
| Heart failure - N (%)                          | 48 (6.4)             | 82 (12.2)            | 0.201           |
| COPD - N (%)                                   | 47 (6.2)             | 80 (11.9)            | 0.198           |

Table S5 Legend. Comparison of patients hospitalized with COVID-19, influenza, and all other conditions. a) SD = standardized difference. SD>0.1 reflects imbalance between groups. Comorbidities were categorized from ICD-10-CA discharge diagnoses using the CCSR tool. COPD: Chronic Obstructive Pulmonary Disease.

**Table S6. Unadjusted clinical outcomes, resource use, and clinical care of patients with COVID-19, influenza, and other conditions, among patients admitted from the emergency department**

| Variable                                | COVID-19        | Influenza         | p        |
|-----------------------------------------|-----------------|-------------------|----------|
| Number of Admissions                    | 753             | 673               |          |
| Death – N (%)                           | 154 (20.5)      | 37 (5.5)          | <0.001   |
| 7-day Readmission – N (%) <sup>a</sup>  | 28 (5.2)        | 21 (3.4)          | 1**      |
| 30-day Readmission – N (%) <sup>b</sup> | 47 (10.3)       | 59 (9.5)          | 0.72     |
| ICU – N (%)                             | 137 (18.2)      | 101 (15.0)        | 0.124    |
| Hospital LOS, days – median (IQR)       | 6.8 (3.0, 16.2) | 4.7 (2.2, 9.5)    | <0.001   |
| ED LOS, hours – median (IQR)            | 8.7 (6.1, 13.2) | 21.1 (12.0, 32.2) | <0.001** |
| ICU LOS, days – median (IQR)            | 7.9 (2.7, 15.4) | 6.3 (2.8, 13.3)   | 0.60     |
| Invasive mechanical ventilation – N (%) | 79 (10.5)       | 50 (7.4)          | 1**      |
| GI Endoscopy – N (%)                    | 16 (2.1)        | 23 (3.4)          | 1**      |
| Bronchoscopy – N (%)                    | <6 (<0.8)*      | 32 (4.8)          | <0.001** |
| Renal Replacement Therapy – N (%)       | 29 (3.9)        | 37 (5.5)          | 1**      |
| CT Thorax – N (%)                       | 159 (21.1)      | 147 (21.8)        | 1**      |
| Respiratory Antibiotic – N (%)          | 518 (69.4)      | 505 (75.5)        | 0.685**  |
| Corticosteroid – N (%)                  | 104 (13.9)      | 243 (36.3)        | <0.001** |
| Warfarin or DOAC – N (%)                | 111 (14.9)      | 133 (19.9)        | 0.816**  |

Table S5 Legend. Readmission to a medical service or medical-surgical ICU at any participating hospital is reported. For hospital resources and clinical care, we report the number of patients receiving at least one of the items described. ICU: Intensive Care Unit. a) After excluding patients who died and those discharged in the last 7 days of the study period, the denominator was 538 admissions for COVID-19 and 625 for influenza. b) After excluding patients who died and those discharged in the last 30 days of the study period, the denominator was 456 admissions for COVID-19 and 624 for influenza. LOS: Length-of-stay. GI: Gastrointestinal. Renal replacement therapy included hemodialysis and peritoneal dialysis and included both chronic use and new starts. CT: Computed tomography. Antibiotic: we report the use of respiratory-acting antibiotics (see Appendix). DOAC: direct-acting oral anticoagulant. \*All counts less than 6 suppressed to reduce risk of patient reidentification. \*\*p-values were adjusted using Bonferroni correction for the secondary outcomes.

**Table S7. Clinical outcomes in patients with COVID-19 compared to influenza before and after multivariable adjustment, among patients admitted from the emergency department**

| Outcome      | Unadjusted        |        | Adjusted          |        |
|--------------|-------------------|--------|-------------------|--------|
|              | Effect (95% CI)   | p      | Effect (95% CI)   | p      |
| Death        | 3.72 (2.64, 5.25) | <0.001 | 3.96 (2.80, 5.59) | <0.001 |
| ICU          | 1.21 (0.96, 1.53) | 0.11   | 1.28 (1.00, 1.64) | 0.048  |
| Readmission  | 1.09 (0.76, 1.57) | 0.64   | 1.19 (0.82, 1.73) | 0.36   |
| Hospital LOS | 1.19 (0.96, 1.47) | 0.12   | 1.22 (1.03, 1.45) | 0.02   |
| ICU LOS      | 0.64 (0.35, 1.17) | 0.15   | 0.79 (0.54, 1.17) | 0.24   |

Table S7 Legend. Poisson regression models were fit for death, ICU, and readmission (effect: adjusted relative risk) and negative binomial regression models were fit for hospital LOS and ICU LOS (effect: adjusted rate ratio). Models were adjusted for patient age, sex, long-term care residence, Charlson comorbidity index score, admitting hospital, neighbourhood-level income and visible minority concentration quintiles. Outcomes reported are: in-hospital death, admission to ICU at any point during hospitalization, readmission to a medical service or medical-surgical ICU at any participating hospital within 30-days of discharge, hospital LOS, and ICU LOS. ICU: intensive care unit. LOS: length-of-stay.

**Table S8. Unadjusted outcomes stratified by age, among patients admitted from the emergency department**

| <b>Outcome</b>                    | <b>COVID-19</b>  | <b>Influenza</b> | <b>p</b> |
|-----------------------------------|------------------|------------------|----------|
| Age <50 years – N                 | 166              | 115              |          |
| Death – N (%)                     | <6 (<3.6)*       | <6 (<5.2)*       | 0.623    |
| 30-day Readmission – N (%)        | 12 (9.8)         | 7 (6.4)          | 0.034    |
| ICU – N (%)                       | 28 (16.9)        | 15 (13.0)        | 0.370    |
| Hospital LOS, days – median (IQR) | 4.7 (1.8, 9.0)   | 3.2 (1.3, 6.7)   | 0.003    |
| Age 50-75 years – N               | 333              | 335              |          |
| Death – N (%)                     | 42 (12.6)        | 13 (3.9)         | <0.001   |
| 30-day Readmission – N (%)        | 28 (11.8)        | 27 (8.5)         | 0.052    |
| ICU – N (%)                       | 83 (24.9)        | 60 (17.9)        | 0.024    |
| Hospital LOS, days – median (IQR) | 6.7 (2.9, 16.4)  | 4.4 (1.9, 8.4)   | <0.001   |
| Age >75 years – N                 | 254              | 223              |          |
| Death – N (%)                     | 108 (42.5)       | 23 (10.3)        | <0.001   |
| 30-day Readmission – N (%)        | 7 (7.4)          | 25 (12.6)        | 0.40     |
| ICU – N (%)                       | 26 (10.2)        | 26 (11.7)        | 0.209    |
| Hospital LOS, days – median (IQR) | 10.6 (4.5, 24.0) | 6.0 (3.7, 11.7)  | <0.001   |

Table S8 Legend. Readmission to a medical service or medical-surgical ICU at any participating hospital is reported. ICU: Intensive Care Unit. LOS: Length-of-stay. \*All counts less than 6 suppressed to reduce risk of patient reidentification.

**Table S9. Characteristics, clinical outcomes, resource use, and clinical care of ICU patients, among patients admitted from the emergency department**

| Variable                                | COVID-19         | Influenza        | p        |
|-----------------------------------------|------------------|------------------|----------|
| Number of admissions                    | 137              | 101              |          |
| Age - median (IQR)                      | 62 (52, 73)      | 67 (56, 77)      | 1**      |
| Age Group – N (%)                       |                  |                  | 1**      |
| <50                                     | 28 (20.4)        | 15 (14.9)        |          |
| 50-75                                   | 83 (60.6)        | 60 (59.4)        |          |
| >75                                     | 26 (19.0)        | 26 (25.7)        |          |
| Male Gender – N (%)                     | 78 (56.9)        | 56 (55.4)        | 1**      |
| Charlson Score – N (%)                  |                  |                  | 0.01**   |
| 0                                       | 73 (53.3)        | 30 (29.7)        |          |
| 1                                       | 31 (22.6)        | 23 (22.8)        |          |
| 2+                                      | 33 (24.1)        | 48 (47.5)        |          |
| Long-Term Care Resident – N (%)         | 8 (5.8)          | <6 (<6.0)*       | 1**      |
| Death – N (%)                           | 41 (29.9)        | 19 (18.8)        | 0.07     |
| 30-day Readmission – N (%)              | 6 (8.2)          | 10 (12.3)        | 0.57     |
| Hospital LOS, days – median (IQR)       | 15.9 (9.7, 26.5) | 15.0 (7.3, 32.6) | 0.81     |
| ED LOS, hours – median (IQR)            | 7.1 (4.6, 9.8)   | 12.5 (7.2, 24.4) | <0.001** |
| ICU LOS, days – median (IQR)            | 7.9 (2.7, 15.4)  | 6.3 (2.8, 13.3)  | 0.60     |
| Invasive mechanical ventilation – N (%) | 77 (56.2)        | 50 (49.5)        | 1**      |
| GI Endoscopy – N (%)                    | <6 (<4.4)*       | 11 (10.9)        | 1**      |
| Bronchoscopy – N (%)                    | <6 (<4.4)*       | 22 (21.8)        | 0.001**  |
| Renal Replacement Therapy – N (%)       | 19 (13.9)        | 13 (12.9)        | 1**      |
| CT Thorax – N (%)                       | 45 (32.8)        | 41 (40.6)        | 1**      |
| Antibiotic – N (%)                      | 119 (88.1)       | 94 (94.0)        | 1**      |
| Corticosteroid – N (%)                  | 40 (29.6)        | 48 (48.0)        | 0.32**   |
| Warfarin or DOAC – N (%)                | 24 (17.8)        | 25 (25.0)        | 1**      |

Table S9 Legend. Readmission to a medical service or medical-surgical ICU at any participating hospital is reported. For hospital resources and clinical care, we report the number of patients receiving at least one of the items described. ICU: Intensive Care Unit. LOS: Length-of-stay. GI: Gastrointestinal. Renal replacement therapy included hemodialysis and peritoneal dialysis and included both chronic use and new starts. CT: Computed tomography. Antibiotic: we report the use of respiratory-acting antibiotics (see Appendix). DOAC: direct-acting oral anticoagulant. \*Exact number suppressed to reduce risk of patient reidentification. \*\*p-values were adjusted using Bonferroni correction, by multiplying with the number of comparisons presented in this study except main outcomes (Death, 30-day Readmission, ICU, ICU Length of Stay and Hospital Length of Stay).



**Table S10. Analysis of death and ICU transfers as a composite outcome**

| Outcome                                           | COVID-19          | Influenza  | p-value |
|---------------------------------------------------|-------------------|------------|---------|
| Number of Admissions                              | 1027              | 783        | N/A     |
| ICU or Death – N (%)                              | 406 (39.5)        | 161 (20.6) | <0.001  |
| Unadjusted Regression (ICU or Death) – RR (95%CI) | 1.92 (1.64, 2.25) | Referent   | <0.001  |
| Adjusted Regression (ICU or Death) – aRR (95%CI)  | 1.99 (1.70, 2.34) | Referent   | <0.001  |

## Appendix References

1. Verma AA, Pasricha S V, Jung HY, et al. Assessing the quality of clinical and administrative data extracted from hospitals: the General Medicine Inpatient Initiative (GEMINI) experience. *J Am Med Informatics Assoc* 2020;2020.03.16.20036962.
2. Mandell LA, Wunderink RG, Anzueto A, et al. Infectious Diseases Society of America/American Thoracic Society Consensus Guidelines on the management of community-acquired pneumonia in adults. *Clin Infect Dis* 2007;44(SUPPL. 2).
3. Metlay JP, Waterer GW, Long AC, et al. Diagnosis and Treatment of Adults with Community-acquired Pneumonia. An Official Clinical Practice Guideline of the American Thoracic Society and Infectious Diseases Society of America. *Am J Respir Crit Care Med* 2019;200(7):e45–67.
4. Dragan V, Wei Y, Elligsen M, Kiss A, Walker SAN, Leis JA. Prophylactic Antimicrobial Therapy for Acute Aspiration Pneumonitis. *Clin Infect Dis* 2018;67:513-518.
5. Statistics Canada. Postal Code Conversion File Plus (PCCF+). Ottawa: 2020. Available from: <https://www150.statcan.gc.ca/n1/en/catalogue/82F0086X>
6. Canadian Institute for Health Information. Measuring Health Inequalities: A Toolkit – Area-Level Equity Stratifiers Using PCCF and PCCF+. [Internet]. Ottawa, ON: 2018. Available from: <https://www.cihi.ca/sites/default/files/document/cphi-toolkit-area-level-measurement-pccf-2018-en-web.pdf>
7. Wynants L, Van Calster B, Bonten MMJ, et al. Prediction models for diagnosis and prognosis of covid-19 infection: systematic review and critical appraisal. *BMJ* 2020;m1328.
8. Gupta RK, Marks M, Samuels THA, et al. Systematic evaluation and external validation of 22 prognostic models among hospitalised adults with COVID-19: An observational cohort study. *Eur Respir J* 2020;2003498.
9. Lu J, Hu S, Fan R, et al. ACP risk grade: a simple mortality index for patients with confirmed or suspected severe acute respiratory syndrome coronavirus 2 disease (COVID-19) during the early stage of outbreak in Wuhan, China. *medRxiv [Internet]* 2020;2020.02.20.20025510. Available from: <http://medrxiv.org/content/early/2020/02/23/2020.02.20.20025510.abstract>
10. Hu C, Liu Z, Jiang Y, et al. Early prediction of mortality risk among patients with severe COVID-19, using machine learning. *Int J Epidemiol* 2021;49:1918-1929.
11. Xie J, Hungerford D, Chen H, et al. Development and external validation of a prognostic multivariable model on admission for hospitalized patients with COVID-19. *medRxiv* 2020;2020.03.28.20045997. Available from: <http://medrxiv.org/content/early/2020/04/07/2020.03.28.20045997.abstract>
12. Royal College of Physicians. National Early Warning Score (NEWS). [Internet]. 2017. Available from: [www.rcplondon.ac.uk/projects/outputs/national-early-warning-score-news-2](http://www.rcplondon.ac.uk/projects/outputs/national-early-warning-score-news-2)
13. Fortis S, O’Shea AMJ, Beck BF, et al. An automated computerized critical illness severity scoring system derived from APACHE III: modified APACHE. *J Crit Care* 2018;48:237–42.
14. Fortis S, O’Shea AMJ, Beck MAE BF, et al. A simplified critical illness severity scoring system (CISS): Development and internal validation. *J Crit Care* 2021;61:21–8.
15. Knight SR, Ho A, Pius R, et al. Risk stratification of patients admitted to hospital with covid-19 using the ISARIC WHO Clinical Characterisation Protocol: Development and validation of the 4C Mortality Score. *BMJ* 2020;370(September):1–13.
